# Supplementary material for: Overexpression of BnaA10.WRKY75 Decreases Cadmium and Salt Tolerance via Increasing ROS Accumulation in Arabidopsis and Brassica napus L
Source: MDPI journal article supplement (doi:10.3390/ijms25148002), 2024-07-22
Supplement: s1 [file s1]

## Supplementary Information

**Journal Name:** International Journal of Molecular Sciences

**Manuscript Title:** Overexpression of *BnaA10.WRKY75* decreases cadmium and salt tolerance via increasing ROS accumulation in *Arabidopsis* and *Brassica napus* L.

**Authors:** Xiaoke Ping, Qianjun Ye, Mei Yan, Jia Wang, Taiyuan Zhang, Sheng Chen, Kadambot H. M. Siddique, Wallace A. Cowling, Jiana Li, Liezhao Liu

**Name, affiliation, and email of corresponding author:**

Liezhao Liu

College of Agronomy and Biotechnology, Southwest University, Chongqing 400715, China.

[liezhao@swu.edu.cn](mailto:liezhao@swu.edu.cn)

**Content:** Table S1 and Figure S1

**Table S1.** List of primers used in the study

| Primer name                                                     | Sequence (5'-3')                           |
|-----------------------------------------------------------------|--------------------------------------------|
| <b>Primers for constructing overexpression vector</b>           |                                            |
| BnaA10WRKY75 F                                                  | <u>GGATCC</u> CATGGAAGGATATGATGATGGATCG    |
| BnaA10WRKY75 R                                                  | <u>AAGCTT</u> AAAAGAAGAGTAGATTTGCATTTGGGTG |
| <b>Primers for constructing subcellular localization vector</b> |                                            |
| subBnaA10WRKY75 F                                               | <u>GAATTC</u> CATGGAAGGATATGATGATGGATCG    |
| subBnaA10WRKY75 R                                               | <u>AAGCTT</u> AAAAGAAGAGTAGATTTGCATTTGGGTG |
| <b>Primers for constructing GUS reporter gene vector</b>        |                                            |
| <b>Table S1 (Continued)</b>                                     |                                            |
| Primer name                                                     | Sequence (5'-3')                           |
| pBnaA10WRKY75 F                                                 | GCG <u>AAGCTT</u> GTAAGCGTCGTAGTAGCATCCTTG |

pBnaA10WRKY75 R     **GTACCATGGGTCCCAATTA**ACTCTGGAATC

### Primers for qRT-PCR

|               |                            |
|---------------|----------------------------|
| BnaHMA4c F    | GGAGAGATAACTATGGCATGTGAGG  |
| BnaHMA4c R    | CTTCCTTCAAACCACAAACAGACAT  |
| AtSOS1 F      | GCAGGAAAGTGCATTGGTTCTTC    |
| AtSOS1 R      | AACCAATGCTGTTGCAGTCG       |
| BnaA03.CAT2 F | GGAGCGTATTCCAGAGCGC        |
| BnaA03.CAT2 R | TGGATGACAGTGGAGAAACGC      |
| BnaA08.CAT2 F | GCTTCGCAGTCAAGTTCTACACT    |
| BnaA08.CAT2 R | GTTTGGTTTAAGCGCGTGGAC      |
| BnaC03.CAT2 F | TCACACCACCCTGAGAGCTTG      |
| BnaC03.CAT2 R | GAGACTTGACTCCACACGTG       |
| BnaC07.CAT2 F | CCGGCAAAGCTCACTACGTC       |
| BnaC07.CAT2 R | CTCAGGCCAGGTCTTGGTC        |
| AtCAT2 F      | ACCTTTACACCAGAGAGGCAAG     |
| AtCAT2 R      | GACTTATCAGCCTGAGACCAGT     |
| AtActin2 F    | GGTAACATTGTGCTCAGTGGTGG    |
| AtActin2 R    | AACGACCTTAATCTTCATGCTGC    |
| BnaActin 7 F  | GGAAGCTCCTGGAATCCATGAGA    |
| BnaActin 7 R  | TCTTTGCTCATACGGTCAGCAATTCC |

The bold and underlined nucleotides represent extra bases and recognition sites of restriction enzymes, respectively.

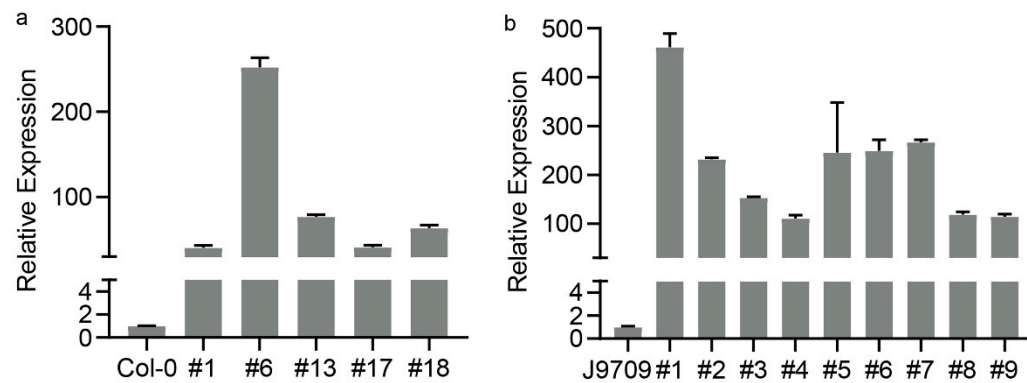

**Figure S1.** Overexpression level of *BnaA10.WRKY75* in transgenic (a) *Arabidopsis* and (b) rapeseed plants.
